# Supplementary material
Source: HighWire-hosted journal article supplement (https://www.g3journal.org/content/suppl/2015/04/13/g3.115.016808)
Supplement: FigureS1.pdf [file FigureS1.pdf]

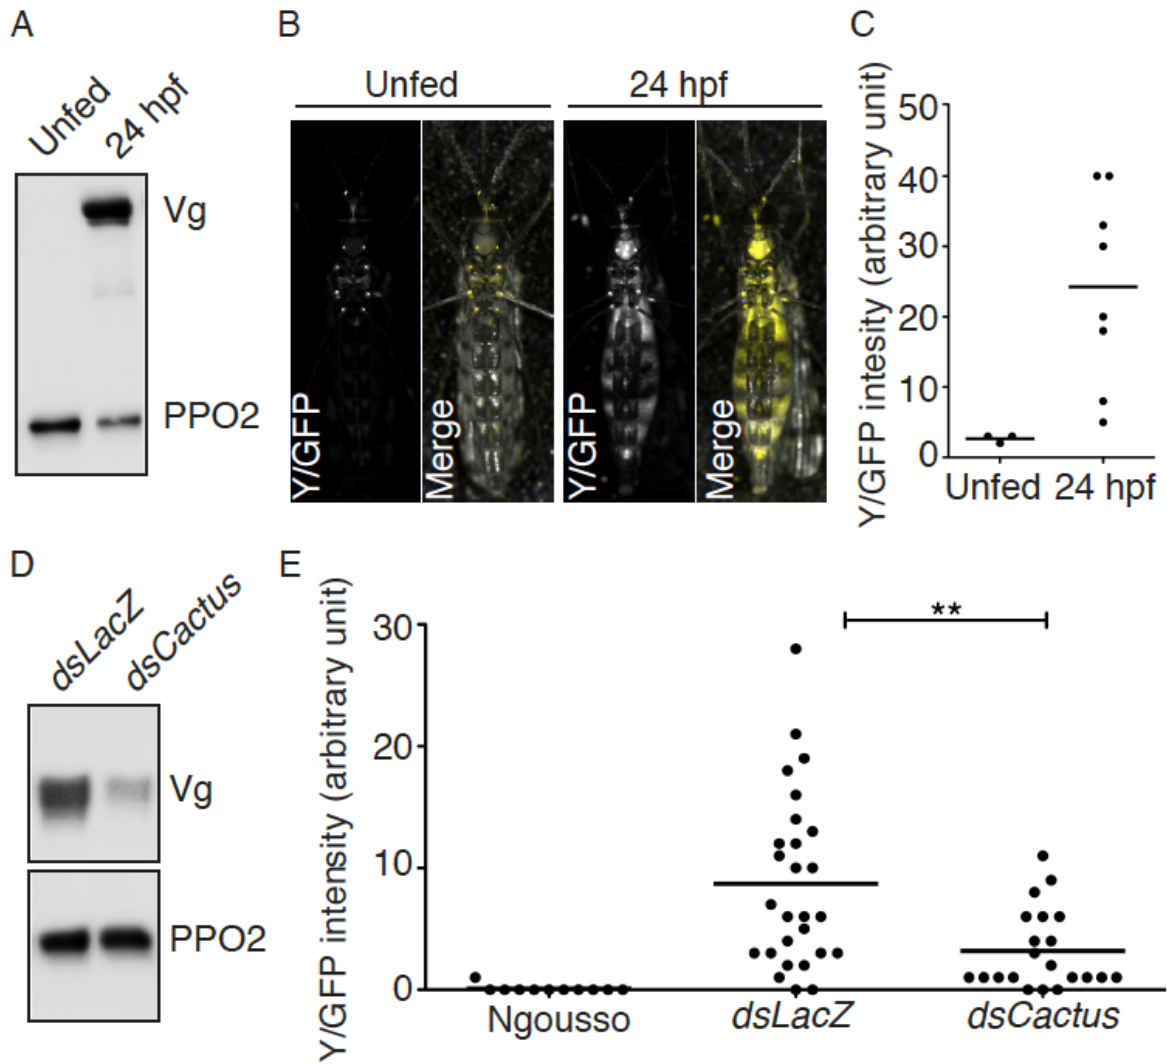

**Figure S1 Expression of the *Vg::YFP* reporter in the FK line reproduces endogenous *Vg* expression.** A: Expression of Vitellogenin (*Vg*) monitored by immunoblotting of mosquito hemolymph extracts from unfed and 24 h blood-fed FK mosquitoes. Anti-PPO2 antibodies were used as a loading control. B: Fluorescence analysis of FK mosquitoes reveals expression of the *Vg-YFP* reporter in the fat body 24 h post feeding while expression of the transgenesis marker *3xP3-GFP* in mosquito neurons is seen in both unfed and fed mosquitoes. C: Quantification of the YFP/GFP signal in the mosquito bodies expressed as mean of intensity. D: FK mosquitoes were injected with a control dsRNA (*dsLacZ*) or *dsCactus* and offered a blood meal infected with *P. berghei*. Immunoblotting was performed on the hemolymph extracted 52 h after infection using anti-Vitellogenin and anti-PPO2 antibodies. E: Quantification of YFP/GFP intensities from the same mosquitoes as in D 52 h after infection. Non-transgenic Ngouso mosquitoes were used as a control. \*\*:  $p \leq 0.01$  (1 way ANOVA). Pictures were acquired with a Leica AF6000E fluorescent stereomicroscope equipped with an M205 FA module. Images were analyzed with FIJI, by quantification of ROI in the delineated regions corresponding to the mosquito abdomen/thorax. Mean fluorescence intensity of the YFP/GFP signal was measured for each individual mosquito.
